# Supplementary material for: Multi-omics analysis of pyroptosis regulation patterns and characterization of tumor microenvironment in patients with hepatocellular carcinoma
Source: PeerJ. 2023 May 11;11:e15340. doi: 10.7717/peerj.15340 (PMC10183172; doi:10.7717/peerj.15340)
Supplement: Supplemental Information 6 [file peerj-11-15340-s006.xlsx]

## Sheet: Sheet1
	GAPDH	MDK
N1	22.31	29.64
	22.32	29.53
	22.22	29.86	22.2833	29.6767	7.39333	1.04333	0.485205
N2		30.91
	23.42	30.7
	23.43	31.31	23.425	30.9733	7.54833	1.19833	0.435778
N3	21.43	27.79
	21.24	27.76
	21.43	27.6	21.3667	27.7167	6.35	0	1
N4	23.02	30.55
	22.96	30.6
	23.18	30.85	23.0533	30.6667	7.61333	1.26333	0.41658
N5	20.72	28.4
	20.78	28.4
	20.67	27.99	20.7233	28.2633	7.54	1.19	0.438303
T1	17.87	23.97
	17.87	23.94
	17.96	23.79	17.9	23.9	6	-0.35	1.27456
T2	19.04	24.26
	18.97	24.23
	18.93	24.3	18.98	24.2633	5.28333	-1.06667	2.09459
T3	19.86	23.73
	19.96	23.93
	19.86	23.99	19.8933	23.8833	3.99	-2.36	5.1337
T4	18.98	26.38
	18.81	26.23
	18.86	26.08	18.8833	26.23	7.34667	0.996667	0.501157
T5	19.48	23.4
		23.91
	19.61	23.79	19.545	23.7	4.155	-2.195	4.5789
